# Supplementary material
Source: HighWire-hosted journal article supplement (https://adc.bmj.com/content/suppl/2003/01/22/88.2.108)
Supplement: 882108Table3.pdf [file 882108Table3.pdf]

**Table 3. Comparison of the at-risk infants assigned to the behavioural and control conditions on week 12 behaviours.**

|                                                  | <b>Behavioural Group<br/>(N=37)</b> | <b>Control Group<br/>(N=80)</b> |
|--------------------------------------------------|-------------------------------------|---------------------------------|
| <i>Number of infants feeding by breast only:</i> | <b>(17 : 8 : 12)</b>                | <b>(46 : 17 : 17)</b>           |
| <i>breast &amp; bottle : bottle only</i>         |                                     |                                 |
| <b><i>Feeding</i></b>                            |                                     |                                 |
| Mean (SD) total 24hr minutes of feeding          | 141.6 (50.9)                        | 153.6 (63.5)                    |
| breast only                                      | 158.5 (62.2)                        | 160.7 (71.5)                    |
| breast & bottle                                  | 137.9 (37.9)                        | 153.1 (65.2)                    |
| bottle only                                      | 120.3 (31.4)                        | 134.2 (26.7)                    |
| Total 24hr number of feeds                       | 8.3 (2.8)                           | 9.3 (2.7)                       |
| breast only                                      | 9.3 (3.2)                           | 10.2 (2.5)                      |
| breast & bottle                                  | 8.1 (2.1)                           | 9.1 (2.6)                       |
| bottle only                                      | 7.0 (2.0)                           | 7.1 (2.2)                       |
| Mean (SD) minutes of night-time feeding*         | 50.1 (29.4)                         | 65.1 (37.8)                     |
| breast only                                      | 62.0 (36.2)                         | 70.6 (41.2)                     |
| breast & bottle                                  | 42.1 (16.4)                         | 67.1 (39.0)                     |
| bottle only                                      | 38.5 (18.5)                         | 48.4 (19.3)                     |
| Night time number of feeds**                     | 2.8 (1.3)                           | 3.7 (1.5)                       |
| breast only                                      | 3.6 (1.3)                           | 4.1 (1.5)                       |
| breast & bottle                                  | 2.4 (0.6)                           | 3.8 (1.2)                       |
| bottle only                                      | 2.3 (1.5)                           | 2.5 (0.8)                       |
| <b><i>Crying</i></b>                             |                                     |                                 |
| Mean (SD) total 24hr minutes of fuss/crying      | 74.8 (34.8)                         | 67 (37.3)                       |
| breast only                                      | 70.2 (26.8)                         | 68.9 (39.2)                     |
| breast & bottle                                  | 91.2 (49.7)                         | 52.7 (31.8)                     |
| bottle only                                      | 70.4 (33.2)                         | 75.9 (34.8)                     |
| Total 24hr number of fuss/cry bouts              | 7.1 (3.5)                           | 7.0 (3.7)                       |
| breast only                                      | 7.1 (3.7)                           | 7.4 (4.1)                       |
| breast & bottle                                  | 9.5 (3.3)                           | 5.6 (3.0)                       |
| bottle only                                      | 5.5 (2.4)                           | 7.3 (3.2)                       |
| Night time fuss/cry duration                     | 23.1 (14.8)                         | 23.8 (17.1)                     |
| breast only                                      | 26.0 (13.5)                         | 24.7 (17.5)                     |
| breast & bottle                                  | 19.6 (17.0)                         | 19.7 (13.6)                     |
| bottle only                                      | 19.2 (15.2)                         | 25.4 (19.2)                     |
| Night time number of fuss/cry bouts              | 2.1 (1.4)                           | 2.5 (1.8)                       |
| breast only                                      | 2.6 (1.7)                           | 2.7 (2.0)                       |
| breast & bottle                                  | 1.9 (1.1)                           | 2.1 (1.2)                       |
| bottle only                                      | 1.5 (0.8)                           | 2.4 (1.6)                       |
| <b><i>Sleeping</i></b>                           |                                     |                                 |
| Mean (SD) total 24hr minutes of sleep            | 861.8 (81.6)                        | 828.7 (87.7)                    |
| breast only                                      | 837.3 (88.2)                        | 823.3 (88.4)                    |
| breast & bottle                                  | 852.7 (62.6)                        | 829.9 (107.3)                   |
| bottle only                                      | 902.5 (72.0)                        | 842.4 (64.5)                    |
| Total 24hr number of sleep bouts                 | 8.6 (1.6)                           | 9.3 (2.3)                       |
| breast only                                      | 9.1 (1.6)                           | 9.8 (2.5)                       |
| breast & bottle                                  | 7.9 (1.0)                           | 9.0 (2.2)                       |

|                                    |              |              |
|------------------------------------|--------------|--------------|
| bottle only                        | 8.4 (1.7)    | 8.5 (1.6)    |
| Night time sleep duration***       | 593.0 (55.6) | 550.6 (59.4) |
| breast only                        | 578.8 (63.2) | 543.9 (57.5) |
| breast & bottle                    | 604.8 (51.1) | 545.8 (65.2) |
| bottle only                        | 605.2 (45.5) | 573.4 (56.3) |
| Night time number of sleep bouts** | 3.6 (1.0)    | 4.3 (1.5)    |
| breast only                        | 3.8 (1.0)    | 4.5 (1.5)    |
| breast & bottle                    | 3.0 (0.9)    | 4.4 (1.4)    |
| bottle only                        | 3.7 (1.0)    | 3.6 (1.2)    |

\*\*\*p<.001; \*\*p<.01;\*p<.05.
